# Supplementary material for: Overexpression of Rice Histone H1 Gene Reduces Tolerance to Cold and Heat Stress
Source: MDPI journal article supplement (doi:10.3390/plants12132408), 2023-06-22
Supplement: s1 [file s1]

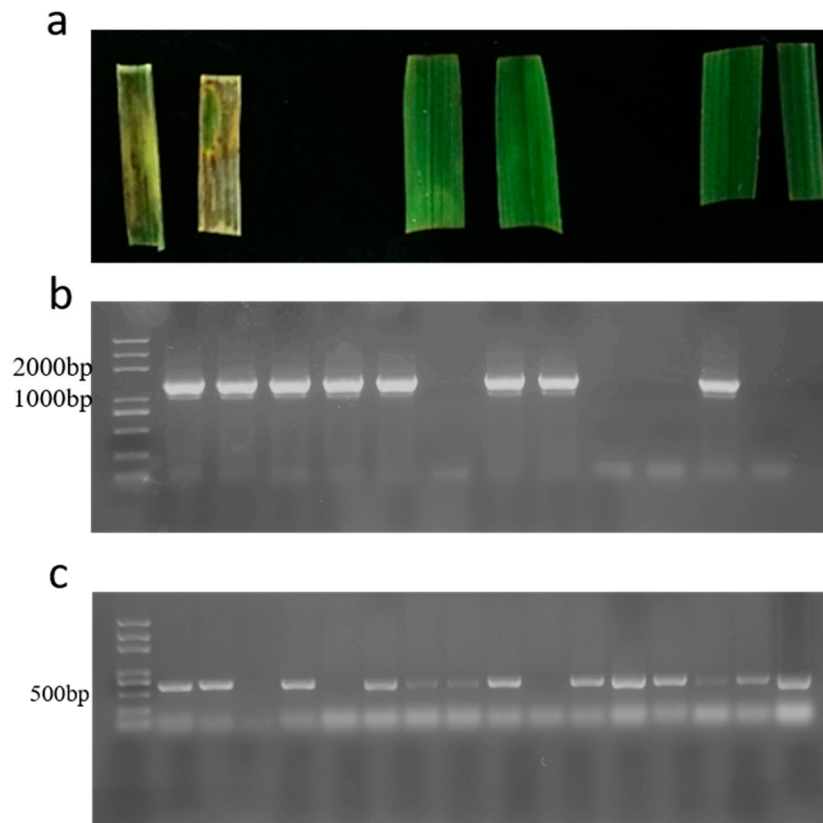

Figure S1. Detection of transgenic rice (a) Transgenic rice was screened with hygromycin. (Wild-type on the left, *OsHis1.1* promoter-GUS transgenic rice in the middle and *OsHis1.1*-OE transgenic rice on the right ). (b) Detection of *OsHis1.1* promoter-GUS transgenic rice (primer: OsH1.1-GUS-F and GUS-R ). (c) Detection of *OsHis1.1*-OE transgenic rice (primer:35S and OsH1.1-Z-R)

Table S1. Cloning and detection primers

| Primers              | Sequence                                         |
|----------------------|--------------------------------------------------|
| <i>OsH1.1</i> -OE-F  | 5'-tggagaggacagcccaagcttATGCCTGCCATGGCCAAG-3'    |
| <i>OsH1.1</i> -OE-R  | 5'-gtaccgaattcccggggatccTCAAGCTGCAGGTGCCTTG-3'   |
| <i>OsH1.1</i> -GFP-F | 5'-tggagaggacagcccaagcttATGCCTGCCATGGCCAAG-3'    |
| <i>OsH1.1</i> -GFP-R | 5'-ctcaccatgaccggtggatccGCTGCAGGTGCCTTGCGG-3'    |
| <i>OsH1.1</i> -GUS-F | 5'-gacctgcaggcatgcaagcttATCCTACGTCGAGCCATCCTC-3' |
| <i>OsH1.1</i> -GUS-R | 5'-ttaccctcagatctaccatggCGCAACTTCGCAAGCAGAC-3'   |
| <i>OssHSP24.1</i> -F | 5'-TGCTCAAGGTGGTCGTGCCC-3'                       |
| <i>OssHSP24.1</i> -R | 5'-CCAAAACCTTTATCTCCATAACTT-3'                   |
| <i>OsHSP26</i> -F    | 5'-CCTCGTGGACCCGATGTC-3'                         |
| <i>OsHSP26</i> -R    | 5'-CACCATCACCTTCACCTCCT-3'                       |
| <i>OsHSP101</i> -F   | 5'-GGAGGAGTACCGCAAGTACG-3'                       |
| <i>OsHSP101</i> -R   | 5'-GAGGTCGATCGCTTTGTCAG-3'                       |
| <i>OsCBF1</i> -F     | 5'-GAGACCTTCGCCAACGATG-3'                        |
| <i>OsCBF1</i> -R     | 5'-CACCGGCAACACGTCCTT-3'                         |
| <i>OsCBF2</i> -F     | 5'-TACGGCAACATGGACTTCGA-3'                       |
| <i>OsCBF2</i> -R     | 5'-GCCCATCCCGTCGTCGTAGTAGTAG-3'                  |
| <i>OsCBF3</i> -F     | 5'-AGCGACCTGGCGTTTCG-3'                          |
| <i>OsCBF3</i> -R     | 5'-TCGCGTAGTACAGGTCCCA-3'                        |
| <i>OsTPP1</i> -F     | 5'-CCTTCAGCAAATCATGAGCA-3'                       |
| <i>OsTPP1</i> -R     | 5'-AGCCTCCAGCACTTCGTTTA-3'                       |
| <i>OsUBQ5</i> -F     | 5'-ACCACTTCGACCGCCACTACT-3'                      |
| <i>OsUBQ5</i> -R     | 5'-ACGCCTAAGCCTGCTGGTT-3'                        |
| <i>OsH1.1</i> -Z-R   | 5'-gtaccgaattcccggggatccTCAAGCTGCAGGTGCCTTG-3'   |
| 35S                  | 5'-CGCACAATCCCACTATCCTTCG-3'                     |
| <i>OsH1.1</i> -GUS-F | 5'-gacctgcaggcatgcaagcttATCCTACGTCGAGCCATCCTC-3' |
| GUS-R                | 5'-CTTCCTCATCCACGACCG-3'                         |
